# Supplementary material for: A Shallow Angle Short-Axis Out-of-Plane Approach Reduces the Rate of Posterior Wall Injuries in Central Venous Catheterization: A Simulation Study
Source: Hindawi journal article supplement (doi:10.1155/2018/4793174), 2018-09-10
Supplement: f1 [file 4793174.f1.pdf]

# Demographic data of participants

| Participants No. | Age (year) | Medical working experience (months) | Sex (M/F) | Experience of CVC |
|------------------|------------|-------------------------------------|-----------|-------------------|
| 1                | 28         | 10                                  | M         | NO                |
| 2                | 28         | 10                                  | M         | NO                |
| 3                | 28         | 11                                  | M         | NO                |
| 4                | 26         | 10                                  | M         | NO                |
| 5                | 30         | 11                                  | M         | NO                |
| 11               | 28         | 12                                  | M         | NO                |
| 12               | 27         | 1                                   | M         | NO                |
| 13               | 28         | 1                                   | F         | NO                |
| 14               | 26         | 1                                   | M         | NO                |
| 15               | 25         | 1                                   | F         | NO                |
| 16               | 28         | 2                                   | F         | NO                |
| 17               | 35         | 3                                   | M         | NO                |
| 18               | 26         | 2                                   | M         | NO                |
| 19               | 29         | 2                                   | M         | NO                |
| 21               | 24         | 2                                   | F         | NO                |
| 22               | 25         | 3                                   | F         | NO                |
| 23               | 24         | 3                                   | F         | NO                |
| 24               | 25         | 3                                   | M         | NO                |
| 25               | 25         | 4                                   | M         | NO                |
| 26               | 35         | 4                                   | M         | NO                |
| 27               | 26         | 4                                   | F         | NO                |
| 28               | 24         | 4                                   | M         | NO                |
| 29               | 26         | 4                                   | F         | NO                |
| 30               | 24         | 4                                   | F         | NO                |
| 31               | 25         | 4                                   | M         | NO                |
| 32               | 26         | 4                                   | M         | NO                |
| 33               | 24         | 5                                   | M         | NO                |
| 34               | 25         | 5                                   | F         | NO                |
| 35               | 24         | 5                                   | F         | NO                |
| 36               | 29         | 4                                   | M         | NO                |
| 37               | 26         | 5                                   | M         | NO                |
| 38               | 29         | 5                                   | M         | NO                |
| 39               | 25         | 5                                   | F         | NO                |
| 40               | 25         | 5                                   | M         | NO                |

# Results (outcomes)

| Participant No. | Procedure type | Posterior vessel wall injury | Arterial injury | Needle Passes (n) | Procedure duration (sec) |    |   |           |    |   |    |    |   |           |    |   |    |
|-----------------|----------------|------------------------------|-----------------|-------------------|--------------------------|----|---|-----------|----|---|----|----|---|-----------|----|---|----|
| 1               | C              | Injury                       | NO              | 1                 | 70                       | 1  | N | Injury    | NO | 1 | 35 | 1  | S | No injury | NO | 1 | 39 |
| 2               | C              | Injury                       | NO              | 1                 | 25                       | 2  | N | Injury    | NO | 1 | 31 | 2  | S | No injury | NO | 1 | 31 |
| 3               | C              | No injury                    | NO              | 1                 | 44                       | 3  | N | Injury    | NO | 2 | 26 | 3  | S | No injury | NO | 1 | 27 |
| 4               | C              | Injury                       | NO              | 1                 | 32                       | 4  | N | No injury | NO | 1 | 40 | 4  | S | No injury | NO | 1 | 28 |
| 5               | C              | No injury                    | NO              | 1                 | 42                       | 5  | N | No injury | NO | 1 | 31 | 5  | S | No injury | NO | 1 | 35 |
| 11              | C              | No injury                    | NO              | 1                 | 25                       | 11 | N | No injury | NO | 1 | 19 | 11 | S | No injury | NO | 1 | 22 |
| 12              | C              | No injury                    | NO              | 1                 | 78                       | 12 | N | Injury    | NO | 1 | 41 | 12 | S | No injury | NO | 1 | 50 |
| 13              | C              | No injury                    | NO              | 1                 | 28                       | 13 | N | No injury | NO | 1 | 30 | 13 | S | No injury | NO | 1 | 30 |
| 14              | C              | Injury                       | NO              | 1                 | 44                       | 14 | N | No injury | NO | 1 | 26 | 14 | S | No injury | NO | 1 | 30 |
| 15              | C              | No injury                    | NO              | 1                 | 58                       | 15 | N | No injury | NO | 1 | 65 | 15 | S | No injury | NO | 1 | 41 |
| 16              | C              | Injury                       | NO              | 1                 | 50                       | 16 | N | No injury | NO | 1 | 49 | 16 | S | No injury | NO | 1 | 43 |
| 17              | C              | Injury                       | NO              | 1                 | 128                      | 17 | N | Injury    | NO | 1 | 35 | 17 | S | Injury    | NO | 1 | 53 |
| 18              | C              | Injury                       | NO              | 1                 | 56                       | 18 | N | Injury    | NO | 1 | 36 | 18 | S | No injury | NO | 1 | 45 |
| 19              | C              | Injury                       | NO              | 1                 | 65                       | 19 | N | No injury | NO | 1 | 46 | 19 | S | No injury | NO | 1 | 45 |
| 21              | C              | No injury                    | NO              | 1                 | 59                       | 21 | N | Injury    | NO | 1 | 71 | 21 | S | No injury | NO | 1 | 73 |
| 22              | C              | Injury                       | NO              | 1                 | 52                       | 22 | N | Injury    | NO | 1 | 85 | 22 | S | Injury    | NO | 1 | 95 |
| 23              | C              | No injury                    | NO              | 1                 | 52                       | 23 | N | Injury    | NO | 1 | 42 | 23 | S | Injury    | NO | 1 | 69 |
| 24              | C              | Injury                       | NO              | 1                 | 39                       | 24 | N | Injury    | NO | 1 | 51 | 24 | S | No injury | NO | 1 | 47 |
| 25              | C              | No injury                    | NO              | 1                 | 77                       | 25 | N | Injury    | NO | 1 | 52 | 25 | S | No injury | NO | 1 | 41 |
| 26              | C              | No injury                    | NO              | 1                 | 61                       | 26 | N | No injury | NO | 1 | 33 | 26 | S | No injury | NO | 1 | 96 |
| 27              | C              | No injury                    | NO              | 1                 | 42                       | 27 | N | No injury | NO | 1 | 35 | 27 | S | No injury | NO | 1 | 50 |
| 28              | C              | Injury                       | NO              | 1                 | 43                       | 28 | N | Injury    | NO | 1 | 44 | 28 | S | No injury | NO | 1 | 38 |
| 29              | C              | Injury                       | NO              | 1                 | 41                       | 29 | N | No injury | NO | 1 | 43 | 29 | S | No injury | NO | 1 | 52 |
| 30              | C              | Injury                       | NO              | 1                 | 42                       | 30 | N | No injury | NO | 1 | 37 | 30 | S | No injury | NO | 1 | 56 |
| 31              | C              | Injury                       | NO              | 1                 | 93                       | 31 | N | No injury | NO | 1 | 47 | 31 | S | No injury | NO | 1 | 64 |
| 32              | C              | Injury                       | NO              | 1                 | 85                       | 32 | N | No injury | NO | 1 | 49 | 32 | S | No injury | NO | 1 | 76 |
| 33              | C              | Injury                       | NO              | 1                 | 48                       | 33 | N | Injury    | NO | 1 | 41 | 33 | S | No injury | NO | 1 | 36 |
| 34              | C              | Injury                       | NO              | 1                 | 65                       | 34 | N | Injury    | NO | 1 | 28 | 34 | S | No injury | NO | 1 | 36 |
| 35              | C              | No injury                    | NO              | 1                 | 63                       | 35 | N | No injury | NO | 1 | 38 | 35 | S | No injury | NO | 1 | 43 |
| 36              | C              | No injury                    | NO              | 1                 | 66                       | 36 | N | No injury | NO | 1 | 69 | 36 | S | No injury | NO | 1 | 69 |
| 37              | C              | No injury                    | NO              | 1                 | 67                       | 37 | N | No injury | NO | 1 | 46 | 37 | S | No injury | NO | 1 | 69 |
| 38              | C              | No injury                    | NO              | 1                 | 76                       | 38 | N | No injury | NO | 1 | 67 | 38 | S | No injury | NO | 1 | 42 |
| 39              | C              | No injury                    | NO              | 1                 | 38                       | 39 | N | No injury | NO | 1 | 29 | 39 | S | No injury | NO | 1 | 40 |
| 40              | C              | Injury                       | NO              | 1                 | 58                       | 40 | N | No injury | NO | 1 | 59 | 40 | S | No injury | NO | 1 | 54 |

# Results (Questionnaire)

| Participants No. | Comfort grading against Procedure C | Comfort grading against Procedure N | Comfort grading against Procedure S | Choice of preferred procedure |
|------------------|-------------------------------------|-------------------------------------|-------------------------------------|-------------------------------|
| 1                | 4                                   | 3                                   | 5                                   | Procedure S                   |
| 2                | 4                                   | 2                                   | 5                                   | Procedure S                   |
| 3                | 3                                   | 2                                   | 5                                   | Procedure S                   |
| 4                | 3                                   | 3                                   | 5                                   | Procedure S                   |
| 5                | 2                                   | 5                                   | 4                                   | Procedure N                   |
| 11               | 4                                   | 5                                   | 4                                   | Procedure N                   |
| 12               | 3                                   | 5                                   | 5                                   | Procedure S                   |
| 13               | 3                                   | 4                                   | 5                                   | Procedure S                   |
| 14               | 4                                   | 5                                   | 4                                   | Procedure N                   |
| 15               | 4                                   | 5                                   | 3                                   | Procedure N                   |
| 16               | 2                                   | 4                                   | 4                                   | Procedure S                   |
| 17               | 2                                   | 3                                   | 4                                   | Procedure S                   |
| 18               | 4                                   | 4                                   | 4                                   | Procedure S                   |
| 19               | 4                                   | 4                                   | 5                                   | Procedure S                   |
| 21               | 5                                   | 4                                   | 4                                   | Procedure C                   |
| 22               | 4                                   | 5                                   | 5                                   | Procedure N                   |
| 23               | 5                                   | 4                                   | 3                                   | Procedure S                   |
| 24               | 4                                   | 5                                   | 4                                   | Procedure N                   |
| 25               | 4                                   | 5                                   | 3                                   | Procedure N                   |
| 26               | 4                                   | 5                                   | 2                                   | Procedure N                   |
| 27               | 4                                   | 4                                   | 2                                   | Procedure N                   |
| 28               | 2                                   | 5                                   | 4                                   | Procedure N                   |
| 29               | 4                                   | 5                                   | 4                                   | Procedure S                   |
| 30               | 3                                   | 4                                   | 3                                   | Procedure N                   |
| 31               | 3                                   | 4                                   | 4                                   | Procedure N                   |
| 32               | 3                                   | 4                                   | 5                                   | Procedure S                   |
| 33               | 3                                   | 4                                   | 5                                   | Procedure S                   |
| 34               | 3                                   | 4                                   | 4                                   | Procedure S                   |
| 35               | 3                                   | 4                                   | 4                                   | Procedure S                   |
| 36               | 4                                   | 5                                   | 4                                   | Procedure N                   |
| 37               | 3                                   | 4                                   | 5                                   | Procedure S                   |
| 38               | 4                                   | 5                                   | 3                                   | Procedure S                   |
| 39               | 4                                   | 4                                   | 4                                   | Procedure S                   |
| 40               | 5                                   | 5                                   | 2                                   | Procedure N                   |
